# Supplementary material
Source: publisher figshare collection journal article supplement (https://gsajournals.figshare.com/ndownloader/files/14501147)
Supplement: Supplementary file 1 [file 14501147]

## Sheet: 010319_readthroughTable_forPape
ID	Name	WT	dbp2_null
Q0160	SCEI	11.3056	18.8415
YAL016W	TPD3	0.149871	0.471448
YAL030W	SNC1	0.0121979	0.0370712
YAL037W		0.435803	1.01788
YAR003W	SWD1	0.0638302	0.146853
YBL024W	NCL1	0.0153506	0.0629693
YBL041W	PRE7	0.0868554	0.159011
YBL071W-A	KTI11	0.00877365	0.0324985
YBL081W		0.0754819	0.395854
YBL092W	RPL32	0.215688	0.696377
YBR048W	RPS11B	0.000546324	0.00394011
YBR056W		0.0485104	0.227006
YBR111W-A	SUS1	0.0102444	0.0298642
YBR139W		0.425456	1.47301
YBR149W	ARA1	0.107033	0.337931
YBR165W	UBS1	0.0538644	0.131445
YBR171W	SEC66	0.0283394	0.085486
YBR175W	SWD3	0.0469039	0.222675
YBR189W	RPS9B	0.0595831	0.130786
YBR194W	AIM4	0.00555877	0.0245185
YBR242W		0.284194	0.864187
YBR244W	GPX2	0.0011675	0.0199788
YBR246W	RRT2	0.0248777	0.217395
YBR271W	EFM2	0.017593	0.0434369
YBR278W	DPB3	0.0161663	0.037426
YBR290W	BSD2	0.156162	0.484105
YBR295W	PCA1	0.0553334	0.242969
YCR016W		0.0251066	0.118851
YCR034W	ELO2	0.0339694	0.0714026
YCR036W	RBK1	0.0711114	0.125132
YCR045W-A		0.0262799	0.15646
YCR060W	TAH1	0.0167939	0.216662
YCR063W	BUD31	0.0340709	0.332932
YCR066W	RAD18	0.206807	0.692171
YCR073W-A	SOL2	0.00495822	0.0263831
YDL004W	ATP16	0.0446554	0.131271
YDL006W	PTC1	0.0774603	0.462051
YDL013W	SLX5	0.0075989	0.0425604
YDL051W	LHP1	0.00381573	0.0122789
YDL066W	IDP1	0.00410509	0.0398859
YDL073W	AHK1	0.0343785	0.129249
YDL099W	BUG1	0.00469766	0.0243836
YDL102W	POL3	0.0574697	0.22059
YDL137W	ARF2	0.0289889	0.0759513
YDL155W	CLB3	0.00698804	0.0251951
YDL168W	SFA1	0.00593348	0.0417025
YDL178W	DLD2	0.0124026	0.0694843
YDL212W	SHR3	0.0266289	0.0784436
YDL240W	LRG1	0.00323344	0.0326432
YDR007W	TRP1	0.0214179	0.0591519
YDR021W	FAL1	0.0171423	0.0524642
YDR031W	MIX14	0.0391405	0.245376
YDR065W	RRG1	0.018699	0.0622995
YDR147W	EKI1	0.1638	0.396593
YDR168W	CDC37	0.103997	0.319827
YDR174W	HMO1	1.23641	4.45608
YDR214W	AHA1	0.0115387	0.0449874
YDR232W	HEM1	0.160683	0.340188
YDR235W	PRP42	0.00381882	0.00819883
YDR242W	AMD2	0.0207215	0.0491246
YDR262W		0.0344721	0.166406
YDR299W	BFR2	0.00724207	0.0280192
YDR307W	PMT7	0.00835363	0.0407036
YDR318W	MCM21	0.0295316	0.0501085
YDR325W	YCG1	0.0223202	0.0803636
YDR358W	GGA1	0.0573661	0.167735
YDR363W	ESC2	0.0617087	0.195451
YDR363W-A	SEM1	0.00558503	0.0166286
YDR373W	FRQ1	0.00524433	0.0411326
YDR377W	ATP17	0.0526135	0.174961
YDR381W	YRA1	0.017669	0.110304
YDR386W	MUS81	0.0420071	0.217413
YDR389W	SAC7	0.0129947	0.114725
YDR427W	RPN9	0.00998539	0.029016
YDR452W	PPN1	0.0193906	0.0850229
YDR463W	STP1	0.0217172	0.0949576
YDR472W	TRS31	0.0278691	0.0572389
YDR513W	GRX2	0.0172687	0.0755549
YEL018W	EAF5	0.0363912	0.138064
YEL024W	RIP1	0.110947	0.208414
YEL032W	MCM3	0.0135733	0.0305521
YEL043W		0.154127	0.362797
YEL044W	IES6	0.0264059	0.0585691
YEL072W	RMD6	0.0213734	0.102704
YER009W	NTF2	0.270323	0.631706
YER016W	BIM1	0.0163816	0.0360107
YER019W	ISC1	0.0083342	0.0375177
YER030W	CHZ1	0.070724	0.183471
YER032W	FIR1	0.249417	0.814527
YER048W-A	ISD11	0.0781614	0.246943
YER063W	THO1	0.119238	0.355492
YER074W	RPS24A	0.26556	0.650149
YER088W-B		0.00191922	0.0202859
YER092W	IES5	0.00194937	0.0176017
YER127W	LCP5	0.0470585	0.157531
YER128W	VFA1	0.0216729	0.102124
YER129W	SAK1	0.131389	0.441143
YER131W	RPS26B	0.0506504	0.322279
YER166W	DNF1	0.138069	0.49987
YER185W	PUG1	0.00149018	0.0286898
YER188W		0.326581	1.46389
YFL049W	SWP82	0.00517978	0.0272048
YFR001W	LOC1	0.011635	0.0349441
YFR008W	FAR7	0.469281	1.11508
YFR012W-A		0.093353	0.353617
YFR013W	IOC3	0.000600166	0.00881114
YFR034W-A		0.067222	0.120714
YFR052W	RPN12	0.116764	0.268687
YFR055W	IRC7	0.546781	1.25132
YGL010W	MPO1	0.0349976	0.171858
YGL012W	ERG4	0.0441595	0.239386
YGL041W-A		0.000938623	0.00559331
YGL111W	NSA1	0.180364	0.594815
YGL130W	CEG1	0.613757	3.57039
YGL155W	CDC43	0.138263	0.325214
YGL159W		0.0109406	0.0285774
YGL162W	SUT1	2.12535	4.89459
YGL174W	BUD13	0.0279652	0.134361
YGL191W	COX13	0.0575746	0.248975
YGL202W	ARO8	0.205508	1.61872
YGL210W	YPT32	0.00024403	0.00403809
YGL225W	VRG4	0.0256743	0.0787661
YGR038W	ORM1	0.00696592	0.0540429
YGR046W	TAM41	0.0326062	0.0819268
YGR049W	SCM4	0.0112378	0.0403796
YGR054W		0.195734	0.460149
YGR097W	ASK10	0.319853	0.718319
YGR108W	CLB1	0.046003	0.0884931
YGR118W	RPS23A	0.0365521	0.0813168
YGR129W	SYF2	0.0157492	0.0692451
YGR149W		0.0275802	0.152446
YGR170W	PSD2	0.0263423	0.0664928
YGR275W	RTT102	0.244939	0.530226
YHL015W	RPS20	0.0186004	0.104219
YHL027W	RIM101	0.00814305	0.0431484
YHR002W	LEU5	0.0211084	0.0663335
YHR020W		0.00352226	0.0267308
YHR060W	VMA22	0.210389	0.459643
YHR074W	QNS1	0.0182021	0.0386924
YHR076W	PTC7	0.000179319	0.00468326
YHR103W	SBE22	0.106457	0.437879
YHR122W	CIA2	0.0345459	0.108501
YHR148W	IMP3	0.000614251	0.00956882
YHR178W	STB5	0.00453972	0.0107467
YHR197W	RIX1	0.010101	0.0411979
YHR200W	RPN10	0.00769433	0.0179239
YHR214W-A		0.0933969	0.167683
YIL009W	FAA3	0.00330637	0.0181253
YIL010W	DOT5	0.0559197	0.103695
YIL016W	SNL1	0.0148714	0.0277246
YIL019W	FAF1	0.0155556	0.075429
YIL092W		0.000875204	0.00561594
YIL097W	FYV10	0.0158683	0.0387988
YIR018W	YAP5	0.0161273	0.0563261
YIR023W	DAL81	0.0725686	0.225144
YJL001W	PRE3	0.0184809	0.0783625
YJL014W	CCT3	0.0819902	0.16943
YJL030W	MAD2	0.00320022	0.0488962
YJL046W	AIM22	0.032096	0.0886146
YJL082W	IML2	0.0239129	0.113987
YJL098W	SAP185	0.0780247	0.376779
YJL111W	CCT7	0.00826003	0.0295508
YJL115W	ASF1	0.00697267	0.0293134
YJL126W	NIT2	0.791154	2.78455
YJL148W	RPA34	0.016281	0.0766261
YJL159W	HSP150	0.0033768	0.0230095
YJL174W	KRE9	0.00155956	0.00824626
YJL179W	PFD1	0.0112762	0.0536825
YJL191W	RPS14B	0.053124	0.144558
YJR002W	MPP10	0.00275482	0.0602635
YJR032W	CPR7	0.0132706	0.0346797
YJR035W	RAD26	0.0149778	0.0484427
YJR055W	HIT1	0.0809944	0.299882
YJR064W	CCT5	0.0709097	0.108119
YJR089W	BIR1	0.00836983	0.0458262
YJR094W-A	RPL43B	0.0413096	0.160022
YJR099W	YUH1	0.0726062	0.169537
YJR110W	YMR1	0.0151289	0.0542442
YJR144W	MGM101	0.00833576	0.0768941
YKL002W	DID4	0.0220587	0.0457789
YKL007W	CAP1	0.00260669	0.00807984
YKL015W	PUT3	0.00461308	0.0179909
YKL018W	SWD2	0.0400658	0.23287
YKL023W		0.603217	1.57262
YKL033W	TTI1	0.101928	0.349774
YKL041W	VPS24	0.00574195	0.0266356
YKL058W	TOA2	0.626062	1.64502
YKL077W		0.00117273	0.00677869
YKL088W	CAB3	0.00244118	0.0416671
YKL096W-A	CWP2	0.00923144	0.0522416
YKL098W	MTC2	0.00550969	0.0248016
YKL117W	SBA1	0.0254449	0.0898994
YKL156W	RPS27A	0.378278	0.533525
YKL180W	RPL17A	0.013699	0.07628
YKL181W	PRS1	0.0269735	0.0465391
YKL191W	DPH2	0.00768134	0.0269424
YKL195W	MIA40	0.00032587	0.00262662
YKL204W	EAP1	0.0102292	0.0336406
YKL212W	SAC1	0.0482138	0.12179
YKR003W	OSH6	0.112458	0.36569
YKR030W	GMH1	0.0526705	0.0876774
YKR062W	TFA2	0.00907726	0.0427397
YKR097W	PCK1	0.0177428	0.0702029
YKR106W	GEX2	0.0212915	0.100319
YLL001W	DNM1	0.0067867	0.0287374
YLL008W	DRS1	0.0131945	0.0628084
YLL061W	MMP1	0.0675006	0.239692
YLR007W	NSE1	0.0158453	0.0536593
YLR009W	RLP24	0.00689785	0.032661
YLR011W	LOT6	0.00449623	0.0381277
YLR025W	SNF7	0.0102818	0.0634102
YLR048W	RPS0B	0.00232414	0.0184956
YLR061W	RPL22A	0.00114335	0.00396266
YLR066W	SPC3	0.0168668	0.0483172
YLR086W	SMC4	0.0298849	0.126072
YLR088W	GAA1	0.00917567	0.0304794
YLR135W	SLX4	0.000356344	0.00158858
YLR143W	DPH6	0.00041624	0.00146767
YLR167W	RPS31	0.00396672	0.0137951
YLR180W	SAM1	0.0124327	0.0527441
YLR206W	ENT2	0.0947744	0.443949
YLR220W	CCC1	0.0298116	0.0735263
YLR226W	BUR2	0.00178414	0.0127383
YLR243W	GPN3	0.00244623	0.0246898
YLR264W	RPS28B	0.0350932	0.103789
YLR299W	ECM38	0.0150451	0.0583654
YLR324W	PEX30	0.0353297	0.164947
YLR350W	ORM2	0.469753	0.457131
YLR353W	BUD8	0.00858454	0.0490349
YLR362W	STE11	0.00151179	0.00499571
YLR386W	VAC14	0.129875	0.210527
YLR417W	VPS36	0.00627963	0.0314136
YLR419W		0.00140456	0.00570032
YLR432W	IMD3	0.339517	1.5202
YLR456W		0.00209871	0.0271699
YML024W	RPS17A	0.00282376	0.0199885
YML065W	ORC1	0.0147194	0.0396315
YML098W	TAF13	0.0124413	0.0516849
YML108W		0.0051498	0.0183501
YML131W		0.031889	0.0776235
YMR005W	TAF4	0.730316	1.06583
YMR019W	STB4	0.0274268	0.143062
YMR042W	ARG80	0.00383494	0.0219104
YMR054W	STV1	0.00966901	0.035983
YMR059W	SEN15	0.016165	0.0999983
YMR061W	RNA14	0.00973789	0.026888
YMR079W	SEC14	0.25993	0.384768
YMR096W	SNZ1	0.103914	0.372976
YMR100W	MUB1	0.0142909	0.0573384
YMR122W-A		0.00792908	0.0607956
YMR158W	MRPS8	0.0224916	0.0926371
YMR192W	GYL1	0.00877193	0.0328045
YMR194W	RPL36A	0.222449	0.86117
YMR200W	ROT1	0.0864629	0.216683
YMR246W	FAA4	0.0163839	0.0476834
YMR255W	GFD1	0.00445373	0.0238921
YMR264W	CUE1	0.0751086	0.226491
YMR289W	ABZ2	0.125675	0.325233
YMR304W	UBP15	0.00731379	0.0696723
YNL015W	PBI2	0.163582	0.469484
YNL038W	GPI15	0.177559	0.704832
YNL056W	OCA2	0.00613184	0.0648661
YNL085W	MKT1	0.836212	1.87039
YNL094W	APP1	0.00204228	0.0179352
YNL107W	YAF9	0.00736292	0.0601966
YNL162W-A		0.0609572	0.279195
YNL178W	RPS3	0.0168049	0.075376
YNL190W		0.0305615	0.0860969
YNL193W		0.0206772	0.176551
YNL233W	BNI4	0.0196429	0.0551935
YNL289W	PCL1	0.00860797	0.0297091
YNL312W	RFA2	0.0116582	0.055845
YNL317W	PFS2	0.00489316	0.0158555
YNR010W	CSE2	0.00489573	0.0300715
YNR012W	URK1	0.0313486	0.0720405
YNR021W		0.10853	0.223138
YNR058W	BIO3	0.0316536	0.108362
YNR059W	MNT4	0.0161814	0.162073
YOL004W	SIN3	0.00725175	0.0180092
YOL008W	COQ10	0.0134629	0.111067
YOL032W	OPI10	0.00537206	0.0220022
YOL039W	RPP2A	0.0236819	0.156622
YOL069W	NUF2	0.251633	0.604236
YOL090W	MSH2	0.014779	0.0375984
YOL093W	TRM10	0.0741611	0.170133
YOL103W	ITR2	0.0087972	0.0546596
YOL125W	TRM13	0.0693832	0.19854
YOL127W	RPL25	0.306158	0.799993
YOL129W	VPS68	0.00225086	0.0232898
YOL144W	NOP8	0.0134161	0.0325211
YOR004W	UTP23	0.182912	0.538053
YOR019W		0.115748	0.35849
YOR061W	CKA2	0.879365	2.14104
YOR063W	RPL3	0.17039	0.253483
YOR066W	MSA1	0.00511945	0.0205715
YOR109W	INP53	0.049803	0.110403
YOR142W	LSC1	0.0153899	0.0961693
YOR210W	RPB10	0.0109139	0.0867214
YOR260W	GCD1	0.0810595	0.27494
YOR291W	YPK9	0.0206375	0.04396
YOR293W	RPS10A	0.0158756	0.0498647
YOR304W	ISW2	0.00651226	0.0220452
YOR317W	FAA1	0.00697687	0.0334902
YOR341W	RPA190	0.130787	0.475761
YPL043W	NOP4	0.168586	0.562045
YPL081W	RPS9A	0.00210989	0.0147139
YPL087W	YDC1	0.17805	0.599737
YPL129W	TAF14	0.0451977	0.130846
YPL135W	ISU1	0.0116124	0.0295326
YPL143W	RPL33A	0.0251941	0.0921566
YPL150W		0.0349322	0.0963267
YPL160W	CDC60	0.00230486	0.0198157
YPL175W	SPT14	0.00021858	0.00161956
YPL180W	TCO89	0.0319344	0.0969466
YPL183W-A	RTC6	0.130091	0.418786
YPL185W		0.00429937	0.022749
YPL203W	TPK2	0.00606215	0.0165931
YPL213W	LEA1	0.0141746	0.0383717
YPL228W	CET1	0.000507737	0.00398845
YPL235W	RVB2	0.030995	0.10036
YPL260W		0.170797	0.373922
YPR001W	CIT3	0.00459293	0.0124917
YPR018W	RLF2	0.0237378	0.097293
YPR028W	YOP1	0.0276361	0.100233
YPR043W	RPL43A	0.0375491	0.111623
YPR094W	RDS3	0.000855191	0.00570974
YPR103W	PRE2	0.0589407	0.216573
YPR127W		0.251684	0.456452
YPR159W	KRE6	0.00613387	0.0479357
YPR165W	RHO1	0.00180139	0.0146184
YPR175W	DPB2	0.081414	0.215015
YPR196W		0.000762189	0.00696577
YAL010C	MDM10	0.0175617	0.0475546
YAL029C	MYO4	0.000750312	0.00614724
YAL036C	RBG1	0.0414712	0.101838
YAL040C	CLN3	0.0133048	0.0461623
YAL049C	AIM2	0.023194	0.169815
YAL067C	SEO1	0.158862	0.498809
YAR002C-A	ERP1	0.00896098	0.0414812
YBL010C		0.000171708	0.00567462
YBL014C	RRN6	0.00387597	0.0305877
YBL028C		0.0101634	0.037437
YBL030C	PET9	0.0925015	0.228138
YBL055C		0.00479968	0.0363126
YBR001C	NTH2	0.0251825	0.0708259
YBR009C	HHF1	0.0111003	0.0560041
YBR011C	IPP1	0.0308385	0.146291
YBR014C	GRX7	0.0169156	0.0550321
YBR045C	GIP1	0.0913629	0.445426
YBR049C	REB1	0.742607	1.37035
YBR055C	PRP6	0.122288	0.402377
YBR079C	RPG1	0.0122849	0.0373989
YBR082C	UBC4	0.022707	0.095022
YBR092C	PHO3	0.037344	0.247438
YBR109C	CMD1	0.044786	0.169766
YBR138C		0.797404	2.23121
YBR143C	SUP45	0.0157684	0.0726568
YBR154C	RPB5	0.0864429	0.275795
YBR166C	TYR1	0.00123936	0.0104911
YBR181C	RPS6B	0.0567655	0.131489
YBR216C	YBP1	0.0218469	0.122658
YBR231C	SWC5	0.0608463	0.208946
YBR234C	ARC40	0.0158775	0.108086
YBR240C	THI2	0.00100037	0.00529961
YBR255C-A		0.00361648	0.0192628
YBR260C	RGD1	0.0100241	0.0288081
YBR283C	SSH1	0.0387037	0.20596
YCL031C	RRP7	0.0142807	0.0611119
YCL035C	GRX1	0.287668	0.458419
YCL037C	SRO9	0.0129383	0.050281
YCL049C		0.207665	0.606935
YCL061C	MRC1	0.102131	0.264011
YCR004C	YCP4	0.194444	0.530927
YCR027C	RHB1	0.0174867	0.047392
YCR031C	RPS14A	0.0990097	0.214368
YCR090C		0.0240953	0.119834
YCR092C	MSH3	0.0553556	0.143054
YCR095C	OCA4	0.000780636	0.00443645
YDL005C	MED2	0.00691547	0.0173491
YDL012C		0.716455	2.17555
YDL043C	PRP11	0.0636331	0.151637
YDL045C	FAD1	0.0172594	0.0384505
YDL059C	RAD59	0.0129864	0.105798
YDL061C	RPS29B	0.0244577	0.0708485
YDL063C	SYO1	0.00970318	0.0420817
YDL072C	YET3	0.0338219	0.11346
YDL081C	RPP1A	0.0126335	0.0471133
YDL098C	SNU23	0.0181065	0.0501795
YDL101C	DUN1	0.0322851	0.0492496
YDL126C	CDC48	0.0946259	0.461524
YDL140C	RPO21	0.0539804	0.170535
YDL145C	COP1	0.48445	1.00988
YDL167C	NRP1	0.045499	0.12564
YDL184C	RPL41A	0.037814	0.162779
YDL203C	ACK1	0.100732	0.262606
YDL224C	WHI4	0.0351585	0.117914
YDL226C	GCS1	0.0660692	0.253383
YDL243C	AAD4	0.00157192	0.0119279
YDR005C	MAF1	0.0191575	0.0751109
YDR006C	SOK1	1.68754	4.7147
YDR032C	PST2	0.013104	0.0391074
YDR034C	LYS14	0.00271003	0.141058
YDR050C	TPI1	0.181503	0.345653
YDR054C	CDC34	0.00387067	0.0300205
YDR079C-A	TFB5	0.0198288	0.0847484
YDR101C	ARX1	0.00456233	0.0136441
YDR109C		0.0396926	0.126162
YDR117C	TMA64	0.00580465	0.0120043
YDR123C	INO2	0.143935	0.347409
YDR133C		0.018252	0.0538204
YDR141C	DOP1	0.0172793	0.0484645
YDR151C	CTH1	0.00537137	0.0379152
YDR179C	CSN9	0.0787994	0.150589
YDR190C	RVB1	0.00102523	0.0038454
YDR196C	CAB5	0.196163	0.449002
YDR224C	HTB1	0.00353991	0.0166414
YDR231C	COX20	0.0127437	0.0659276
YDR238C	SEC26	0.0145656	0.0711281
YDR240C	SNU56	0.0961932	0.365285
YDR276C	PMP3	0.0766371	0.3102
YDR277C	MTH1	0.17006	0.455783
YDR298C	ATP5	0.00550717	0.0630761
YDR306C		0.00541851	0.0476869
YDR308C	SRB7	0.00894776	0.04054
YDR333C	RQC1	0.0134281	0.0546819
YDR359C	EAF1	0.00666159	0.0418715
YDR361C	BCP1	0.000905797	0.0205746
YDR369C	XRS2	0.0878254	0.316529
YDR390C	UBA2	0.001481	0.0119804
YDR404C	RPB7	0.00342483	0.0135472
YDR422C	SIP1	0.0538807	0.192009
YDR458C	HEH2	0.00282035	0.0103827
YDR473C	PRP3	3.16682e-05	0.00161159
YDR500C	RPL37B	0.375	0.324444
YEL005C	VAB2	0.0106966	0.0753612
YEL029C	BUD16	0.292824	0.842701
YEL037C	RAD23	0.421056	1.60717
YEL046C	GLY1	0.138621	0.28561
YEL055C	POL5	0.0201378	0.0603059
YER008C	SEC3	0.00297559	0.00708618
YER026C	CHO1	0.0244657	0.135507
YER036C	ARB1	0.00511711	0.035764
YER056C	FCY2	4.69666e-05	0.000744682
YER071C	TDA2	0.099747	0.269267
YER077C	MRX1	0.055352	0.16291
YER099C	PRS2	0.00831895	0.0317887
YER105C	NUP157	0.00215592	0.0136968
YER113C	TMN3	0.0705685	0.172318
YER122C	GLO3	0.0235059	0.12549
YER124C	DSE1	0.0216411	0.0605482
YER126C	NSA2	0.0123454	0.0282315
YER137C		0.0949377	0.250454
YER139C	RTR1	0.248672	0.589715
YER142C	MAG1	0.0571236	0.163283
YER151C	UBP3	0.0879956	0.463252
YER161C	SPT2	0.00133723	0.00589307
YER174C	GRX4	0.0199993	0.0678624
YER186C		0.0780276	0.240747
YER188C-A		0.00588975	0.0252071
YFL039C	ACT1	0.020492	0.272854
YFR005C	SAD1	0.272905	0.846032
YFR011C	MIC19	0.0192204	0.0486108
YFR016C		0.0935347	0.265667
YFR041C	ERJ5	0.0255365	0.084032
YFR050C	PRE4	0.0153957	0.0754851
YGL013C	PDR1	0.0134454	0.0342404
YGL038C	OCH1	0.0172186	0.0588733
YGL044C	RNA15	0.0233204	0.0940393
YGL054C	ERV14	0.0292484	0.063227
YGL070C	RPB9	0.0193943	0.0964559
YGL078C	DBP3	0.272437	0.505479
YGL091C	NBP35	0.0030068	0.0113936
YGL094C	PAN2	0.0101846	0.0433747
YGL112C	TAF6	0.000612687	0.00353366
YGL131C	SNT2	0.0104214	0.101424
YGL136C	MRM2	0.011862	0.0234293
YGL140C		0.0661122	0.166149
YGL142C	GPI10	0.0159507	0.0608707
YGL150C	INO80	0.160065	0.45393
YGL167C	PMR1	0.000767987	0.0103229
YGL206C	CHC1	0.0717493	0.114447
YGL224C	SDT1	0.150003	0.424674
YGL226C-A	OST5	0.00318965	0.0296286
YGL246C	RAI1	0.00793651	0.0328348
YGR015C		0.100717	0.206546
YGR020C	VMA7	0.0143514	0.0331343
YGR027C	RPS25A	0.00310118	0.0125021
YGR037C	ACB1	0.224651	0.607283
YGR071C	ENV11	0.00957164	0.0280943
YGR081C	SLX9	0.0115836	0.0389065
YGR083C	GCD2	0.0848335	0.351485
YGR119C	NUP57	0.00351521	0.0323059
YGR128C	UTP8	0.0445414	0.123663
YGR150C	CCM1	0.286621	0.683223
YGR158C	MTR3	0.0143354	0.0482545
YGR161C	RTS3	0.0663826	0.23806
YGR189C	CRH1	0.439287	2.25955
YGR192C	TDH3	0.0859272	0.369256
YGR193C	PDX1	0.0247568	0.0744444
YGR200C	ELP2	0.00654003	0.0261376
YGR213C	RTA1	0.00528646	0.0199878
YGR235C	MIC26	0.0220105	0.0754747
YGR244C	LSC2	0.103771	0.221726
YGR253C	PUP2	0.430616	1.32287
YGR259C		0.0111111	0.225042
YGR279C	SCW4	6.54322e-05	0.00142739
YGR280C	PXR1	0.0365894	0.129632
YGR282C	BGL2	0.00340123	0.0232847
YHL009C	YAP3	0.00366609	0.0108117
YHL033C	RPL8A	0.00595235	0.0259184
YHR044C	DOG1	0.00338828	0.0124918
YHR046C	INM1	0.0060659	0.0192139
YHR077C	NMD2	0.369997	0.498793
YHR141C	RPL42B	0.00596476	0.0230135
YHR188C	GPI16	0.0311846	0.0815278
YHR193C	EGD2	0.164489	0.605982
YIL007C	NAS2	0.00656967	0.0211303
YIL017C	VID28	0.00923542	0.0392108
YIL027C	EMC5	0.0041635	0.014042
YIL069C	RPS24B	0.622061	1.17462
YIL075C	RPN2	0.159878	0.216527
YIL077C		0.015714	0.0349361
YIL091C	UTP25	0.0357876	0.0640074
YIL096C	BMT5	0.0982024	0.160097
YIL102C-A		0.0246857	0.0581787
YIL127C	RRT14	0.236049	0.471622
YIL133C	RPL16A	0.00650921	0.0278638
YIL157C	COA1	0.238423	0.528662
YIR001C	SGN1	0.167008	0.593671
YIR030C	DCG1	0.150477	0.571236
YIR039C	YPS6	0.251083	0.627542
YJL011C	RPC17	0.0213572	0.0964474
YJL024C	APS3	0.175953	0.481691
YJL038C	LOH1	0.0652193	0.39168
YJL072C	PSF2	0.0202433	0.0332598
YJL101C	GSH1	0.0145559	0.0571048
YJL124C	LSM1	0.0444974	0.157153
YJL136C	RPS21B	0.000833081	0.00744034
YJL139C	YUR1	0.00643202	0.0241192
YJL147C	MRX5	0.0730417	0.157799
YJL151C	SNA3	0.0733003	0.169138
YJR049C	UTR1	0.0613546	0.151694
YJR065C	ARP3	0.0820067	0.2059
YJR067C	YAE1	0.0249434	0.0605516
YJR072C	NPA3	0.00440971	0.0115019
YJR076C	CDC11	0.000248116	0.00250897
YJR088C	EMC2	0.00302825	0.0166626
YJR100C	AIM25	0.00452623	0.0160858
YJR161C	COS5	0.0968379	0.160387
YKL005C	BYE1	0.110895	0.27352
YKL006C-A	SFT1	0.000673401	0.0121867
YKL011C	CCE1	0.0222676	0.0430238
YKL013C	ARC19	14.6032	7.9625
YKL017C	HCS1	0.156611	0.823755
YKL040C	NFU1	0.074018	0.267601
YKL046C	DCW1	0.0533037	0.152589
YKL100C	YPF1	0.0381609	0.136151
YKL128C	PMU1	0.306048	0.744329
YKL151C		0.0731022	1.37545
YKL159C	RCN1	0.0317631	0.0655815
YKL164C	PIR1	0.079297	0.283145
YKL174C	TPO5	0.0293329	0.0793171
YKL179C	COY1	0.0233278	0.0861267
YKL186C	MTR2	0.00389714	0.0310452
YKL197C	PEX1	0.0337819	0.123557
YKL206C	ADD66	0.000536226	0.00256035
YKL209C	STE6	0.042725	0.162826
YKR005C		0.0382824	0.135431
YKR022C	NTR2	0.0489703	0.10754
YKR043C	SHB17	0.00191835	0.00866415
YKR071C	DRE2	0.010535	0.0446644
YKR092C	SRP40	0.0189517	0.0482093
YKR094C	RPL40B	0.00543606	0.0174561
YLL010C	PSR1	0.000609385	0.00784957
YLL013C	PUF3	0.548001	5.96368
YLL018C-A	COX19	0.0120905	0.0250231
YLR016C	PML1	0.126814	0.344539
YLR023C	IZH3	0.0029005	0.0199259
YLR055C	SPT8	0.013713	0.0644168
YLR078C	BOS1	0.0774618	0.171725
YLR082C	SRL2	0.00848724	0.0165554
YLR093C	NYV1	0.0665214	0.237985
YLR110C	CCW12	0.0390949	0.455173
YLR117C	CLF1	0.0197039	0.0875518
YLR120C	YPS1	0.127273	0.443191
YLR130C	ZRT2	0.0542465	0.148163
YLR139C	SLS1	0.00902502	0.0632148
YLR147C	SMD3	0.0765508	0.315316
YLR163C	MAS1	0.00306519	0.0285016
YLR192C	HCR1	0.0640082	0.255265
YLR193C	UPS1	0.23942	0.687626
YLR215C	CDC123	0.00364686	0.0138713
YLR221C	RSA3	0.00171308	0.00401366
YLR239C	LIP2	0.00330023	0.0272635
YLR262C-A	TMA7	0.00688421	0.02637
YLR287C		0.137406	0.574321
YLR298C	YHC1	0.0138453	0.0329144
YLR316C	TAD3	0.00300432	0.018604
YLR321C	SFH1	0.00643557	0.0252108
YLR325C	RPL38	0.0167761	0.0465858
YLR333C	RPS25B	0.409572	0.618926
YLR354C	TAL1	0.320756	0.59995
YLR361C	DCR2	0.694201	1.21639
YLR363C	NMD4	0.0802405	0.335125
YLR370C	ARC18	0.00300259	0.0202172
YLR387C	REH1	0.0790298	0.161515
YLR395C	COX8	0.0381037	0.111546
YLR401C	DUS3	0.123309	0.451532
YLR406C	RPL31B	0.310659	0.874591
YLR421C	RPN13	0.0246029	0.114733
YLR431C	ATG23	0.0020568	0.0162724
YLR452C	SST2	0.208586	0.609506
YML004C	GLO1	0.000262467	0.00400519
YML011C	RAD33	0.255705	0.433245
YML026C	RPS18B	0.0397109	0.14152
YML043C	RRN11	0.0400921	0.105023
YML073C	RPL6A	0.145474	0.307691
YML097C	VPS9	0.0252315	0.0918224
YML107C	PML39	0.0012966	0.00758719
YML110C	COQ5	0.0531379	0.22861
YML115C	VAN1	0.0131743	0.0471991
YML120C	NDI1	0.0166039	0.080161
YMR067C	UBX4	0.0220664	0.0603199
YMR097C	MTG1	0.174911	0.547695
YMR099C		0.0111089	0.0521744
YMR126C	DLT1	0.0215773	0.0926655
YMR166C	MME1	0.0138861	0.040465
YMR168C	CEP3	0.0473705	0.108513
YMR187C		0.0176936	0.0466421
YMR197C	VTI1	0.112774	0.23502
YMR201C	RAD14	0.0378294	0.110637
YMR207C	HFA1	0.0867225	0.329639
YMR216C	SKY1	0.182521	0.530672
YMR229C	RRP5	0.244738	0.679106
YMR235C	RNA1	0.000480592	0.00137512
YMR244C-A	COA6	0.216271	0.536173
YMR299C	DYN3	0.130636	0.343777
YNL003C	PET8	0.0447484	0.109391
YNL005C	MRP7	0.00637399	0.0409419
YNL023C	FAP1	0.035897	0.0915741
YNL024C-A	KSH1	0.0938761	0.296058
YNL037C	IDH1	0.00928767	0.0356714
YNL047C	SLM2	0.00393766	0.0261453
YNL055C	POR1	0.0205293	0.0704195
YNL062C	GCD10	0.0468375	0.181802
YNL064C	YDJ1	0.0797249	0.275293
YNL069C	RPL16B	0.054163	0.114498
YNL074C	MLF3	0.000850908	0.00908868
YNL084C	END3	0.025164	0.0892484
YNL104C	LEU4	0.000859717	0.0124333
YNL115C		0.117344	0.254913
YNL118C	DCP2	0.0311266	0.0833161
YNL133C	FYV6	0.00958687	0.163171
YNL156C	NSG2	0.000504587	0.00442924
YNL159C	ASI2	0.0585209	0.170676
YNL164C	IBD2	0.043566	0.155953
YNL182C	IPI3	1.00192	4.7004
YNL196C	SLZ1	0.025625	0.0940793
YNL221C	POP1	0.0249724	0.0646485
YNL255C	GIS2	0.0161483	0.0573417
YNL305C	BXI1	0.0403119	0.0824436
YNL313C	EMW1	0.00434583	0.0192865
YNL322C	KRE1	0.00586436	0.0182094
YNR011C	PRP2	0.0893253	0.226218
YNR013C	PHO91	0.133746	0.454219
YNR029C		0.0428914	0.176057
YNR032C-A	HUB1	0.13683	0.321622
YNR053C	NOG2	0.0136088	0.0625813
YNR055C	HOL1	0.000299491	0.011477
YNR061C		0.0433501	0.172708
YOL013C	HRD1	0.0265233	0.101169
YOL018C	TLG2	0.0211425	0.0533363
YOL021C	DIS3	0.0227869	0.0556677
YOL040C	RPS15	0.00608453	0.0583142
YOL060C	MAM3	0.0373118	0.0917775
YOL070C	NBA1	0.217154	0.435048
YOL077C	BRX1	0.00552433	0.0129562
YOL101C	IZH4	0.00430108	0.0324914
YOL114C	PTH4	0.127944	0.347411
YOL124C	TRM11	0.00153437	0.0125602
YOL128C	YGK3	0.00614119	0.0319871
YOL159C-A		0.0477039	0.106484
YOR028C	CIN5	0.013349	0.124564
YOR038C	HIR2	0.315179	0.830507
YOR046C	DBP5	0.40835	1.60507
YOR048C	RAT1	0.0710584	0.249245
YOR052C	TMC1	0.017912	0.0519505
YOR074C	CDC21	0.0289601	0.067311
YOR076C	SKI7	0.0118622	0.0310178
YOR081C	TGL5	0.000498089	0.00329396
YOR095C	RKI1	0.109563	0.593021
YOR100C	CRC1	0.0858825	0.35175
YOR103C	OST2	0.0054713	0.023413
YOR128C	ADE2	0.121353	0.421985
YOR129C	AFI1	0.0345685	0.134853
YOR143C	THI80	0.0182686	0.0488891
YOR164C	GET4	0.124461	0.369114
YOR179C	SYC1	0.117921	0.463535
YOR207C	RET1	0.0134373	0.0602786
YOR209C	NPT1	0.00916958	0.048817
YOR226C	ISU2	0.0256701	0.0687703
YOR245C	DGA1	0.0997395	0.340463
YOR256C	TRE2	0.00323697	0.0100853
YOR259C	RPT4	0.0507773	0.152775
YOR261C	RPN8	0.0454162	0.0789674
YOR270C	VPH1	0.00369457	0.0243295
YOR275C	RIM20	0.00312589	0.00667562
YOR279C	RFM1	0.0804482	0.202397
YOR281C	PLP2	0.180719	0.627918
YOR290C	SNF2	0.010566	0.0283187
YOR298C-A	MBF1	0.0944477	0.290723
YOR304C-A	BIL1	0.00968156	0.0569407
YOR327C	SNC2	0.098768	0.393973
YOR344C	TYE7	0.0158082	0.0738316
YOR357C	SNX3	0.0188444	0.0397227
YOR369C	RPS12	1.35556	1.06905
YOR372C	NDD1	0.00462218	0.0193243
YPL002C	SNF8	0.00259734	0.0204938
YPL007C	TFC8	0.213734	0.884978
YPL011C	TAF3	0.0153207	0.0380621
YPL013C	MRPS16	0.0773054	0.191304
YPL015C	HST2	0.0595774	0.161376
YPL042C	SSN3	0.0406426	0.103884
YPL053C	KTR6	0.019374	0.0626229
YPL064C	CWC27	0.760348	1.29672
YPL069C	BTS1	0.00406641	0.0352149
YPL078C	ATP4	0.00426015	0.0117255
YPL083C	SEN54	0.175738	0.4209
YPL106C	SSE1	0.026402	0.141076
YPL115C	BEM3	0.020742	0.119817
YPL127C	HHO1	0.0382222	0.140604
YPL137C	GIP3	7.27405e-05	0.00244729
YPL140C	MKK2	0.000213046	0.00334025
YPL146C	NOP53	0.00289855	0.0105266
YPL151C	PRP46	0.0497057	0.186183
YPL176C	TRE1	0.00288617	0.0126766
YPL186C	UIP4	0.0347818	0.143827
YPL199C		0.0579038	0.198758
YPL202C	AFT2	0.179777	0.410104
YPL206C	PGC1	0.0370774	0.0840034
YPL217C	BMS1	0.0760922	0.270401
YPL234C	VMA11	0.0311095	0.170681
YPL264C		0.0597872	0.14976
YPR010C	RPA135	0.273684	0.735463
YPR022C	SDD4	0.0940757	0.24514
YPR029C	APL4	0.00832298	0.0389304
YPR049C	ATG11	0.00691891	0.0374918
YPR085C	ASA1	0.0123025	0.0553482
YPR088C	SRP54	0.0233792	0.170584
YPR107C	YTH1	0.125341	0.282053
YPR112C	MRD1	0.0544878	0.254437
YPR144C	NOC4	0.0152051	0.0622319
YPR161C	SGV1	0.0168375	0.03654
YPR179C	HDA3	0.0145708	0.0736671
YPR186C	PZF1	0.516667	2.67394
YPR190C	RPC82	0.0223062	0.0635962
YBL039W-B		0.00440017	0.031694
YBR056W-A		0.0499011	0.140536
YBR114W	RAD16	0.0282769	0.080135
YDR033W	MRH1	0.00440044	0.0349103
YDR055W	PST1	0.016048	0.0624751
YDR077W	SED1	0.236128	0.660938
YDR380W	ARO10	0.0439767	0.115669
YDR489W	SLD5	0.0910152	0.258744
YFL055W	AGP3	0.0108238	0.0407261
YFR022W	ROG3	0.0493242	0.0958895
YGL045W	RIM8	0.00165091	0.00931173
YGR198W	YPP1	0.0326045	0.11252
YGR248W	SOL4	0.0152349	0.0339578
YGR271W	SLH1	0.00371554	0.014884
YHL048W	COS8	0.0291944	0.0681679
YHR023W	MYO1	0.0889584	0.259078
YHR137W	ARO9	0.00193	0.00727726
YIL122W	POG1	0.0160033	0.0285417
YIL136W	OM45	0.00392114	0.0215237
YJL092W	SRS2	0.110028	0.20894
YJR092W	BUD4	0.322842	0.777789
YJR096W		0.478735	1.57981
YJR152W	DAL5	0.00358145	0.0166743
YKL150W	MCR1	0.00358818	0.028185
YLR174W	IDP2	0.0724545	0.127188
YLR303W	MET17	0.858963	2.22077
YML042W	CAT2	0.0211012	0.0697904
YMR189W	GCV2	0.040599	0.142063
YMR251W-A	HOR7	0.228398	0.411475
YNL093W	YPT53	0.0661354	0.208162
YNL160W	YGP1	0.130793	0.253843
YOL140W	ARG8	0.0079856	0.0254751
YOR220W	RCN2	0.0471778	0.0963731
YPL024W	RMI1	0.00382998	0.00956006
YPR111W	DBF20	0.0305831	0.129082
YAR018C	KIN3	0.00506705	0.0143749
YBL045C	COR1	0.0701631	0.198786
YBR085C-A		0.011506	0.050135
YBR302C	COS2	0.00517997	0.0188999
YDL187C		0.255366	0.485034
YDR529C	QCR7	0.000677851	0.0128015
YDR533C	HSP31	0.0240984	0.0838395
YER033C	ZRG8	0.00912571	0.0395684
YER054C	GIP2	0.000263905	0.00422243
YER172C	BRR2	0.0198363	0.0612984
YER184C	TOG1	0.00909469	0.0190814
YGR043C	NQM1	0.503499	1.23541
YGR086C	PIL1	0.00752454	0.0136546
YGR289C	MAL11	0.0924534	0.601413
YHR003C	TCD1	0.0102051	0.0373915
YIR031C	DAL7	0.00733592	0.0379451
YJL165C	HAL5	0.0368709	0.108777
YLR254C	NDL1	0.00480188	0.0223233
YML099C	ARG81	0.0326826	0.121167
YMR077C	VPS20	0.107472	0.437203
YMR145C	NDE1	0.0700994	0.274249
YNL058C		0.0435714	0.0794206
YNL125C	ESBP6	0.133343	0.402413
YNL331C	AAD14	0.00478778	0.0240533
YOL052C-A	DDR2	0.0254685	0.10903
YOL119C	MCH4	0.00646305	0.0272953
YOL136C	PFK27	0.0123718	0.0492982
YOR058C	ASE1	0.00454017	0.0206194
YOR161C	PNS1	0.0050517	0.0314892
YPL004C	LSP1	0.0140999	0.0614742
YPL089C	RLM1	0.024313	0.0644345
YPL159C	PET20	0.0573953	0.173164
YPL177C	CUP9	0.0023098	0.0138756
